# Supplementary material
Source: Frontiers journal article supplement (https://www.frontiersin.org/articles/383558)

Figure S1

A

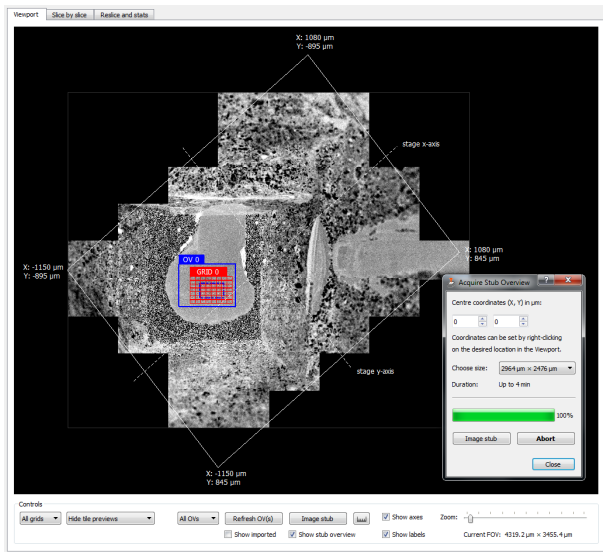

B

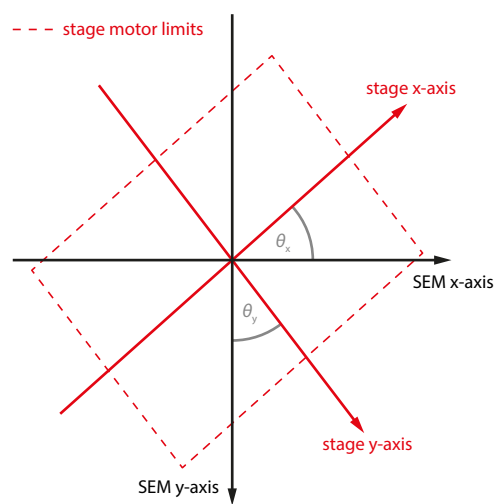

Figure S2

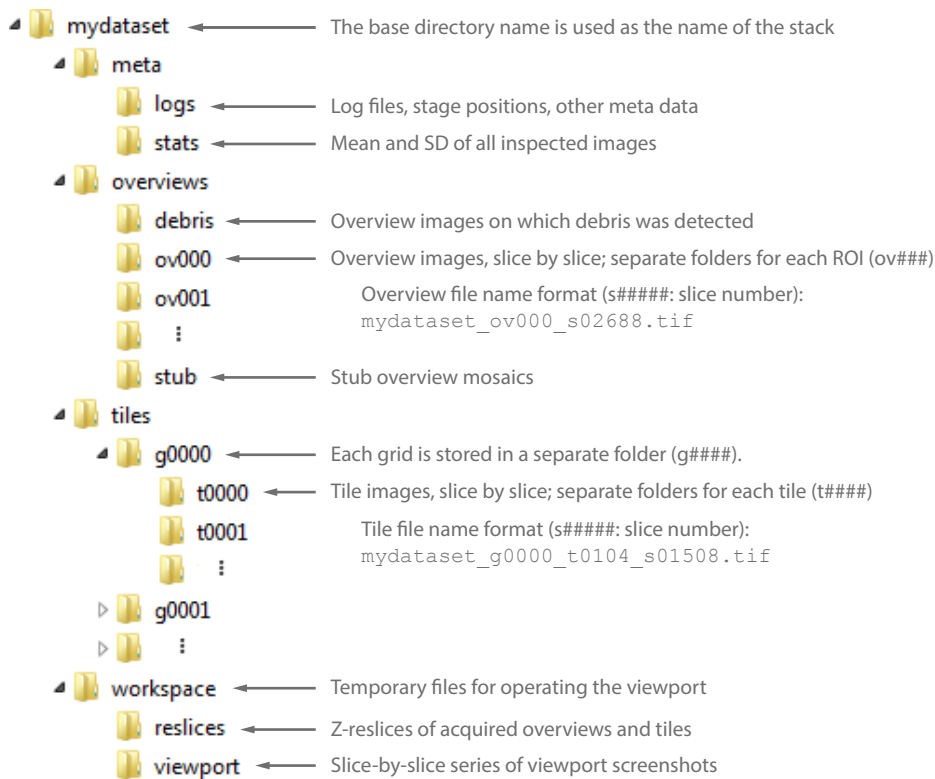

Supplement: Image_1.pdf [file Image_1.pdf]
